# Supplementary material for: Morphological Characterization of Some Local Varieties of Fig (Ficus carica L.) Cultivated in Southern Italy
Source: MDPI journal article supplement (doi:10.3390/su142315970), 2022-11-30
Supplement: s1 [file s1]

**Table S1. Site, accession name and geographical origin of the genotype under investigation.**

| Site            | Accession name          | Latitude (°)  | Longitude (°) | Elevation<br>(m a.s.l.) |
|-----------------|-------------------------|---------------|---------------|-------------------------|
| Bernalda        | Fica de Pistizz         | 40°25'71.4''  | 16°41'43.3''  | 139                     |
|                 | Nostrale nera           | 40°25'74.2''  | 16°41'44.5''  | 141                     |
|                 | Menna vacca             | 40°25'72.2''  | 16°41'43.8''  | 142                     |
|                 | Nostrale bianca         | 40°25'73.0''  | 16°41'44.0''  | 147                     |
|                 | Ficazzana               | 40°25'31.0''  | 16°41'96.5''  | 132                     |
|                 | Violetto                | 40°24'54.53'' | 16°40'49.73'' | 140                     |
|                 | Dottato                 | 40°25'13.77'' | 16°41'57.33'' | 126                     |
|                 | Troiana bianca          | 40°25'15.04'' | 16°41'55.33'' | 126                     |
|                 | Natalino                | 40°25'13.77'' | 16°41'57.33'' | 126                     |
|                 | Dottato                 | 40°05'40.19'' | 16°14'50.41'' | 54                      |
|                 | Ente Riforma            | 40°05'40.25'' | 16°14'51.15'' | 54                      |
| Chiaromonte     | Justa                   | 40°05'40.19'' | 16°14'50.41'' | 395                     |
|                 | Troiano bianco          | 40°05'40.25'' | 16°14'51.15'' | 392                     |
| Nova Siri       | Nostrana                | 40°07'49.10'' | 16°32'48.41'' | 204                     |
|                 | Donna Teresa            | 40°07'56.48'' | 16°33'01.91'' | 150                     |
|                 | Columbraro nero         | 40°08'00.81'' | 16°33'21.86'' | 134                     |
|                 | Troiana                 | 40°07'59.70'' | 16°33'26.49'' | 129                     |
| San Mauro Forte | Agostiniano Nero        | 40°28'22.23'' | 16°16'00.06'' | 430                     |
|                 | Canitano bianco         | 40°28'22.72'' | 16°15'59.75'' | 432                     |
|                 | Dottato bianco          | 40°28'22.67'' | 16°16'2.02''  | 425                     |
|                 | Columbro bianco gentile | 40°28'23.15'' | 16°16'00.69'' | 430                     |
|                 | San Pietro bianco       | 40°28'30.61'' | 16°15'44.45'' | 471                     |
|                 | Troiano bianco          | 40°28'32.28'' | 16°15'44.03'' | 467                     |
|                 | Troiano nero            | 40°28'31.77'' | 16°15'44.03'' | 465                     |
| Tolve           | Spinazzolese            | 40°41'.42.7'' | 16°00'88.8''  | 498                     |
|                 | Gentile                 | 40°41'.40.7'' | 16°00'84.9''  | 488                     |
|                 | Agostarico              | 40°41'.40.0'' | 16°00'85.4''  | 486                     |
| Tursi           | Justa                   | 40°15'18.78'' | 16°29'00.45'' | 256                     |
|                 | Natalino                | 40°14'02.89'' | 16°30'34.71'' | 92                      |
|                 | Faraona                 | 40°15'19.78'' | 16°28'58.25'' | 253                     |

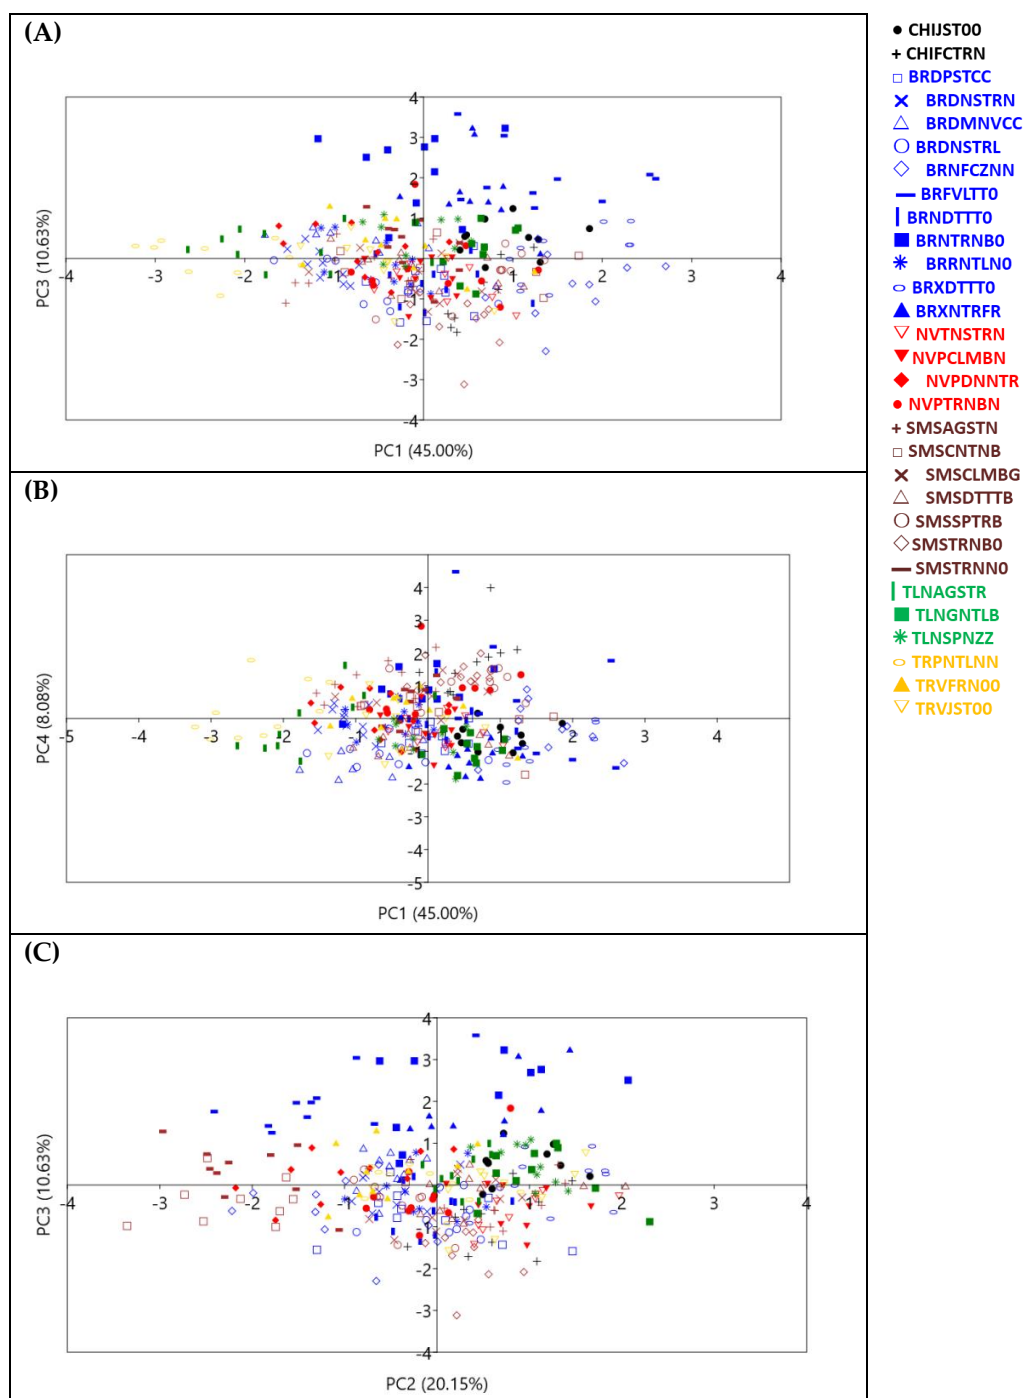

**Figure S1.** Principal components scores of 300 leaves of *Ficus carica* L. accessions (A) PC1 versus PC3; (B) PC1 versus PC4; and (C) PC2 versus PC3.

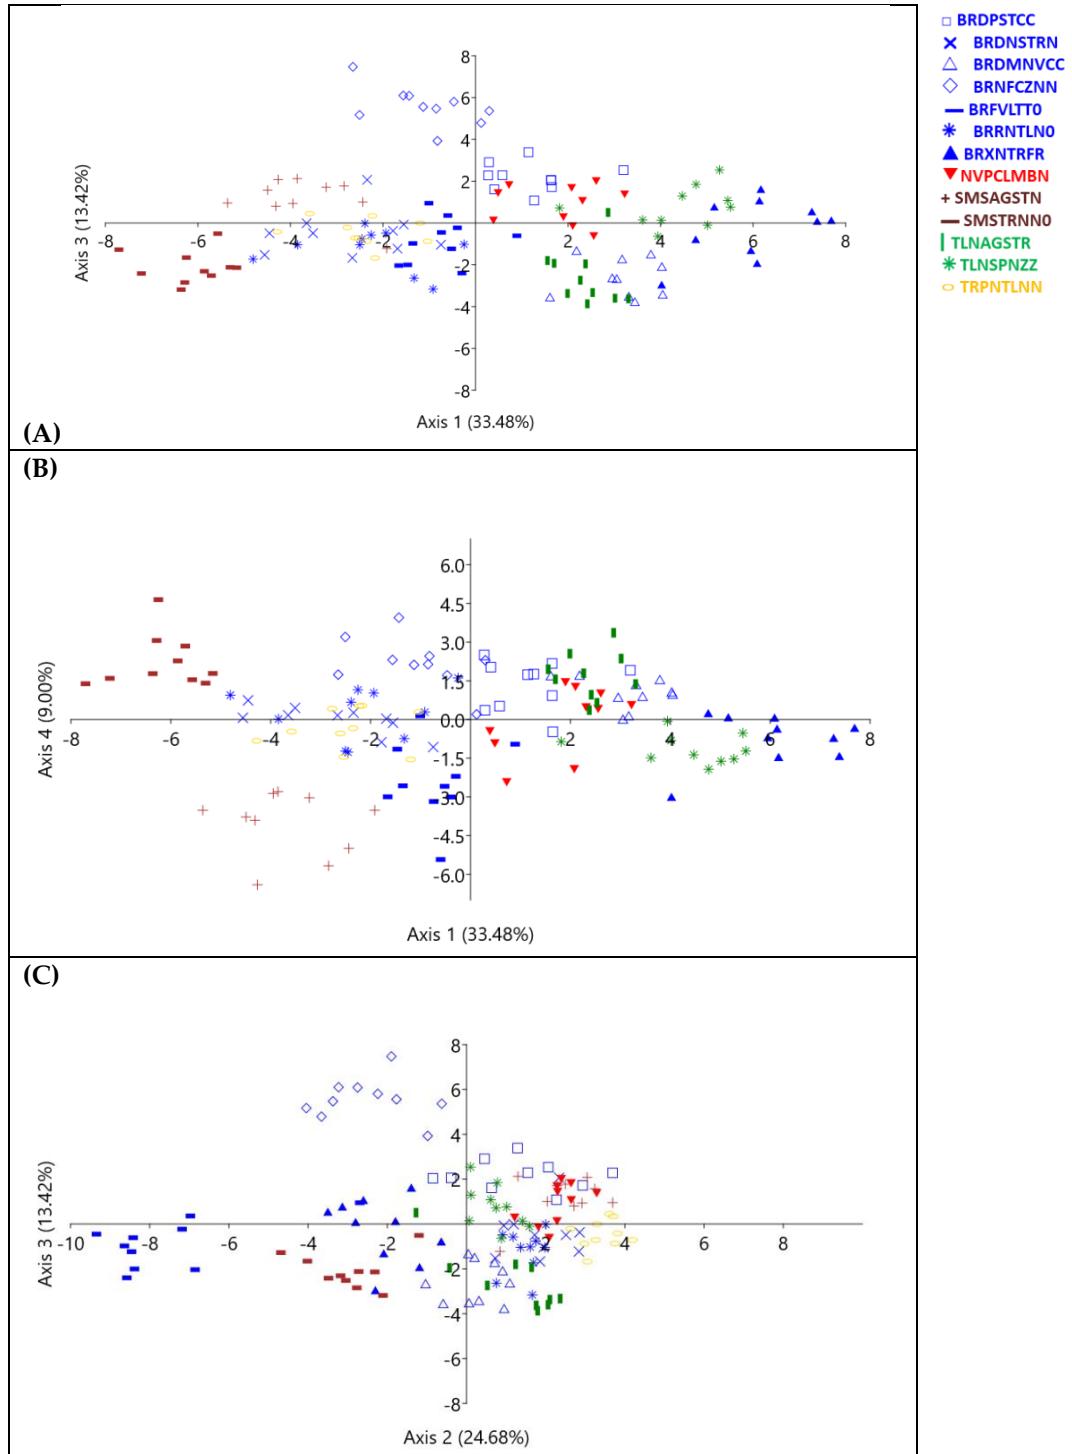

**Figure S2.** Linear discriminant analysis, scores 130 leaves of *Ficus carica* L. of the accessions with dark skin fruit (A) PC1 versus PC3; (B) PC1 versus PC4; and (C) PC2 versus PC3.

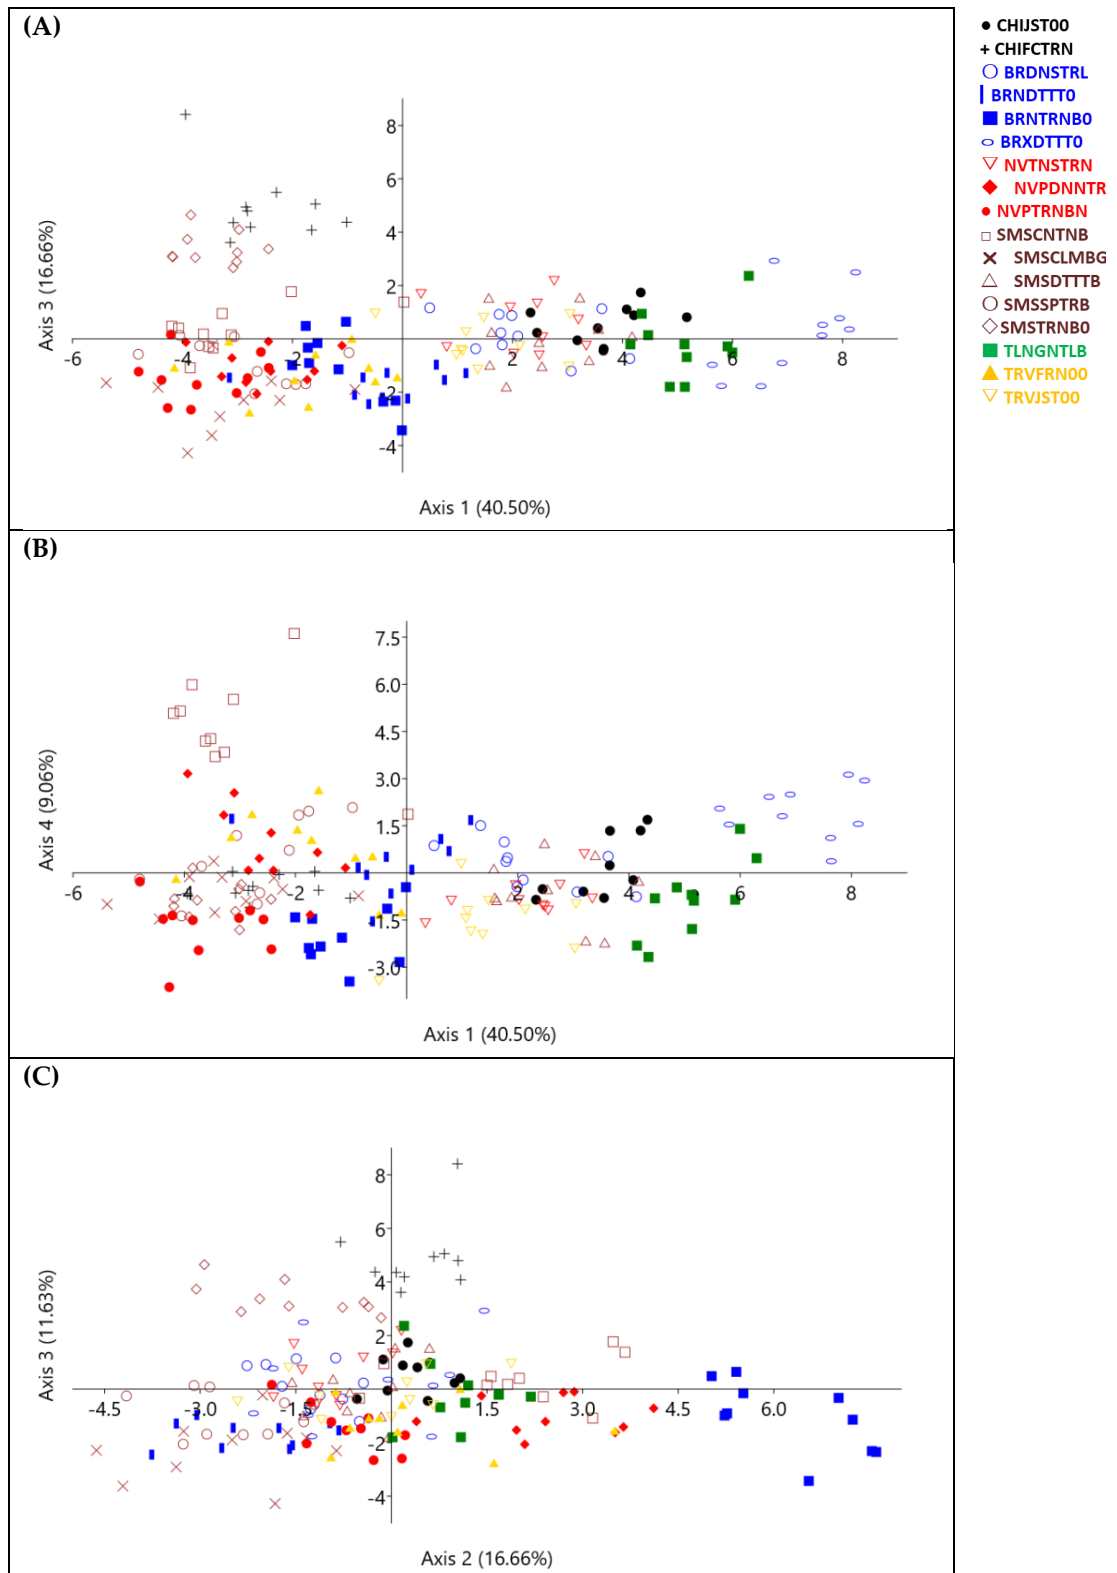

**Figure S3.** Linear discriminant analysis, scores 170 leaves of *Ficus carica* L. of the accessions with green skin fruit. (A) Ax1 versus Ax3; (B) Ax1 versus Ax4, and (C) Ax2 versus Ax3.
